# Supplementary material for: Persistent SARS-CoV-2 RNA Positive in Feces but Negative in Breastmilk: A Case Report of COVID-19 in a Breastfeeding Patient
Source: PubMed Central journal article supplement (PMC7738631; doi:10.3389/fmed.2020.562700), 2020-12-02
Supplement: Data_Sheet_1.pdf [file Data_Sheet_1.pdf]

## Persistent SARS-CoV-2 RNA Positive in faeces but negative in breastmilk: A case report of COVID-19 in a breastfeeding patient

Huikuan Chu<sup>#1</sup>, Jing Li<sup>#1</sup>, Jingjing Yan<sup>#1</sup>, Tai Bai<sup>1</sup>, Bernd Schnabl<sup>2</sup>, Li Zou<sup>3</sup>, Ling Yang<sup>\*1</sup>, Xiaohua Hou<sup>\*1</sup>

<sup>1</sup>Division of Gastroenterology, Union Hospital, Tongji Medical College, Huazhong University of Science and Technology, 1277 Jiefang Avenue, Wuhan 430022, China;

<sup>2</sup>Department of Medicine, University of California San Diego, La Jolla, CA, USA;

<sup>3</sup>Department of *Obstetrics & Gynecology*, Union Hospital, Tongji Medical College, Huazhong University of Science and Technology, 1277 Jiefang Avenue, Wuhan 430022, China

# These authors contributed equally to this paper.

### \* Correspondence to:

Ling Yang, M.D., Ph.D. Division of Gastroenterology, Union Hospital, Tongji Medical College, Huazhong University of Science and Technology, 1277 Jiefang Avenue, Wuhan, 430022, China.

Email: [hepayang@163.com](mailto:hepayang@163.com);

phone +86-2785726678, +8613971178791

Xiaohua Hou, M.D., Ph.D. Division of Gastroenterology, Union Hospital, Tongji Medical College, Huazhong University of Science and Technology, 1277 Jiefang Avenue, Wuhan, 430022, China.

Email: [houxh@hust.edu.cn](mailto:houxh@hust.edu.cn)

Phone +86 -2785726678, +8613035143646

Supplementary Table 1. Laboratory results for patients.

|                                               |                 | Admission<br>day 2 | Admission<br>day 4 | Admission<br>day 5 | Admission<br>day 8 | Admission<br>day 11 | Admission<br>day 14 |                   |                   |
|-----------------------------------------------|-----------------|--------------------|--------------------|--------------------|--------------------|---------------------|---------------------|-------------------|-------------------|
|                                               | normal<br>range | Illness<br>day 7   | Illness<br>day 15  | Illness day<br>18  | Illness day<br>20  | Illness day<br>21   | Illness day<br>24   | Illness day<br>27 | Illness day<br>30 |
| White blood cell<br>count ( $\times 10^9$ /L) | 3.5-9.5         | 4.84               | 5.19               | 4.51               | 4.76               | 5.74                | 4.82                | 5.35              | 4.78              |
| Neutrophil count<br>( $\times 10^9$ /L)       | 1.8-6.3         | 4.00               | 3.47               | 3.27               | 2.99               | 4.10                | 3.18                | 3.51              | 3.10              |
| Lymphocyte<br>count ( $\times 10^9$ /L)       | 1.1-3.2         | 0.54               | 1.29               | 0.90               | 1.22               | 1.10                | 1.09                | 1.23              | 1.10              |
| Lymphocyte (%)                                | 20-50           | 11.10              | 24.80              | 20.00              | 25.60              | 19.20               | 22.60               | 23.00             | 22.50             |
| Hemoglobin (g/L)                              | 130-<br>175     | 140                | 143                | 136                | 122                | 129                 | 124                 | 120               | 123               |
| Platelet count<br>( $\times 10^9$ /L)         | 125-<br>350     | 217                | 228                | 215                | 218                | 220                 | 187                 | 207               | 189               |
| hsCRP (mg/L)                                  | <4.0            | 5.87               | 2.34               | <3.14              | —                  | <3.14               | <3.14               | 4.41              | 4.17              |
| Albumin (g/L)                                 | 35-55           | —                  | 47                 | 47.3               | —                  | 42                  | 42.6                | 40.3              | 41.8              |
| Aspartate<br>aminotransferase<br>(U/L)        | 8-40            | —                  | 18                 | 19                 | —                  | 21                  | 19                  | 20                | 25                |
| Alanine<br>aminotransferase<br>(U/L)          | 5-40            | —                  | 16                 | 17                 | —                  | 13                  | 13                  | 13                | 19                |
| Lactic<br>dehydrogenase<br>(U/L)              | 109-<br>245     | —                  | 200                | 220                | —                  | 191                 | 186                 | 168               | 197               |
| Creatinine<br>( $\mu\text{mol/L}$ )           | 0.5-1.5         | —                  | 0.81               | 0.74               | —                  | 0.71                | 0.75                | 0.63              | 0.64              |
| Blood urea<br>nitrogen (mmol/L)               | 2.9-8.2         | —                  | 3.5                | 3.71               | —                  | 4.28                | 4.86                | 5.13              | 5.05              |
| D-dimer (mg/L)                                | <0.5            | —                  | —                  | 1.12               | —                  | —                   | —                   | —                 | —                 |
